# Supplementary material
Source: publisher site journal article supplement (https://study.sagepub.com/sites/default/files/appendix_2d.pdf)
Supplement: Supplementary file 1 [file appendix_2d.pdf]

## Appendix 2(d) Assessment of Auditory Sequential Memory

Name:

Date of assessment:

Date of birth:

Chronological age:

### Auditory sequential memory (short term)

For primary age children:

#### Instructions:

1. When carrying out this assessment items should be delivered at an even pace of about one item per second (which gives time to repeat a word/item **silently** before saying the next). Say, 'I am going to tell you some things that are in my shopping bag. I want you to say back to me exactly what I have said to you.'

#### Practice item:

Say, 'sausages'. Pupil responds, 'sausages'.

Say, 'Now try two things: tea, jam. Say them back to me in the same order.'

If correct proceed: (Note – you can choose your own items.)

*ALWAYS WRITE DOWN EXACTLY WHAT THE LEARNER SAYS.*

| Series                                                                    | Response (forwards) |
|---------------------------------------------------------------------------|---------------------|
| 1. apples, eggs<br>2. chicken, butter                                     |                     |
| 1. meat, sugar, cola<br>2. cake, spaghetti, milk                          |                     |
| 1. beans, cheese, fish, pizza<br>2. oranges, chocolate, bread, peas       |                     |
| 1. grapes, flour, nuts, sugar, jam<br>2. eggs, crisps, peas, pears, jelly |                     |

2. Explain that you are going to do the same thing using numbers this time. Give an example to practise: 7 – 2. Discontinue when a learner has difficulties.

| Series                                 | Response (forwards) |
|----------------------------------------|---------------------|
| 3 – 7<br>4 – 8                         |                     |
| 7 – 3 – 1<br>4 – 8 – 6                 |                     |
| 5 – 2 – 6 – 1<br>1 – 4 – 9 – 2         |                     |
| 2 – 6 – 1 – 5<br>7 – 9 – 3 – 1         |                     |
| 4 – 9 – 2 – 3 – 6<br>6 – 4 – 3 – 6 – 8 |                     |

In the case of older learners only give the second test (digit span). Increase the number of digits to give two sets of six numbers and two sets of seven.

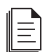

#### Photocopiable

Assessment of Learners with Dyslexic-Type Difficulties 2e © 2018 Sylvia Phillips and Kathleen Kelly (Sage: London).

## Auditory sequential memory (working memory)

### Reverse order

For primary children give both: use second example for older learners.

#### Instructions:

1. Say, 'I am going to tell you again some things that are in my shopping bag. I want you to say back to me what I have said, **but this time** can you say them backwards?'  
'So if I say, "chops, chocolate", you will say, "chocolate, chops".

#### Practice item:

Try this one: sausages, cheese.

If the learner responds correctly, proceed with examples below. (If not, give another example.)

| Series                                                                                | Response (backwards) |
|---------------------------------------------------------------------------------------|----------------------|
| 1. chicken, carrots<br>2. eggs, fish                                                  |                      |
| 1. sugar, gravy, rice<br>2. cake, spaghetti, meat                                     |                      |
| 1. yogurt, cheese, tomatoes, peas<br>2. pizza, honey, cornflakes, melon               |                      |
| 1. strawberries, fish, peas, burgers, carrots<br>2. chips, cola, salad, milk, oranges |                      |

2. Explain that you are going to do the same thing using numbers this time. Give a practice example: 5 – 2. Discontinue when learner has difficulties.

| Series                                                 | Response |
|--------------------------------------------------------|----------|
| 3 – 7<br>8 – 2                                         |          |
| 2 – 4 – 9<br>3 – 7 – 1                                 |          |
| 5 – 3 – 4 – 2<br>7 – 3 – 6 – 4                         |          |
| 2 – 8 – 9 – 1 – 7<br>2 – 5 – 3 – 5 – 4                 |          |
| 9 – 2 – 7 – 8 – 3 – 5<br>4 – 9 – 4 – 3 – 1 – 6         |          |
| 3 – 5 – 9 – 8 – 6 – 4 – 7<br>7 – 1 – 4 – 2 – 9 – 3 – 8 |          |

For older learners, give only the digit span test.

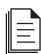

#### Photocopiable

*Assessment of Learners with Dyslexic-Type Difficulties* 2e © 2018 Sylvia Phillips and Kathleen Kelly (Sage: London).
